# Supplementary material for: Chromosomal assembly and analyses of genome-wide recombination rates in the forest pathogenic fungus Armillaria ostoyae
Source: bioRxiv or medRxiv preprint supplement (doi:10.1101/794651), 2019-10-11
Supplement: Supplementary file [file media-1.pdf]

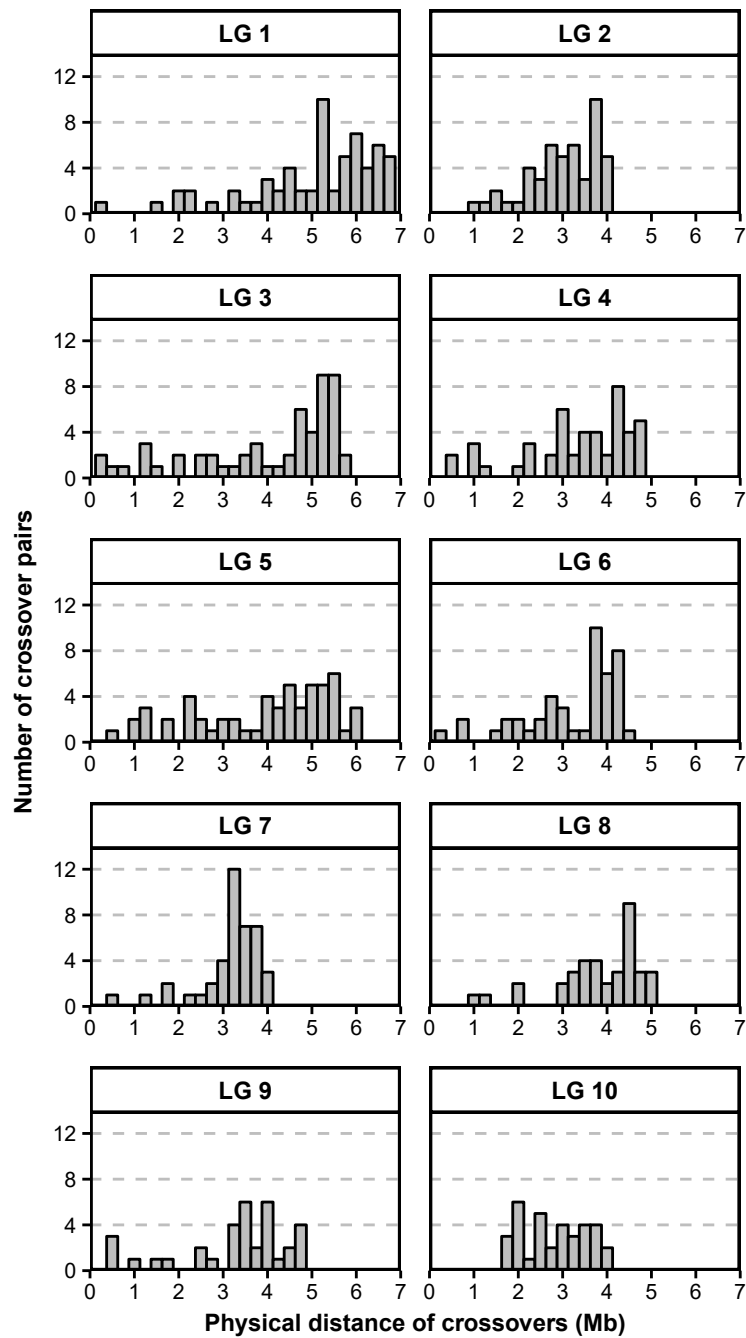

**Supplementary Figure S1.** Physical distance of consecutive crossover events on each of the pseudochromosomes across the 198 analyzed haploid progeny of *Armillaria ostoyae* strain C15. Because a major part of the left chromosome arm of pseudochromosome LG 11 is likely missing, no panel is shown for this pseudochromosome.
